# Supplementary material
Source: PubMed Central journal article supplement (PMC2224237)
Supplement: pnas_0709737104_3.pdf [file pnas_0709737104_3.pdf]

**A**

Exon 4 / Exon 5 /

Ayt11 *GAAATCAAAAAGCGAGCGACATCAGGTGGAGAATGGCCCAG**ATACTAGTTTTCCAGAAGGTA**CTTGTACTAATCGCTCCTGTTTGATTACTTTTAAACCAG**GGAGCCTTCATCCCAGGA*

Ayt11\_v2 -----

Ayt11\_v3 -----

Exon 6 / Exon 7 / Exon 8

Ayt11 *GTTCCAGTGCAGCCCGTCCTCCTCAGATACCCAAACAAGTTG**GATACTGTGACCTGGACCTGGCAAGGCTATACATT**CCTCCAGCTGTGTGTGCTCACTTTCTGTCAACTCTTCACGAAG*

Ayt11\_v2 -----

Ayt11\_v3 -----

**B**

180 190 200 210 220 230 240 250 260

| | | | | | | | |

Ayt12 *GTLIRYIRPVFVSRSDQDSRRKTVEEIKRRAQSNGKWPQIMIF****PEGT****CTNRTCLITFKPGAFIPGVPVQPVVLRYPNKLDITWTWQGPG*

Ayt13 *GALLRFNQAILVSRHDPASRRRVVEEVRRRRATSGGKWPQVLFF****PEGT****CSNKKALLKFKPGAFIAGVPVQPVLIIRYPNSLDTTSWAWRGPG*

Ayt11\_v1 *GRLLRALQPVLVSRVDPDSRKNTINEIKKRATSGGEWPQILVF****PEGT****CTNRSCLITFKPGAFIPGVPVQPVLLRYPNKLDTVTWTWQGYT*

Ayt11\_v2 *GRLLRALQPVLVSRVDPDSRKNTINEIKKRATSGGEWPQ* DTVTWTWQGYT

Ayt11\_v3 *GRLLRALQPVLVSRVDPDSRKNTINEIKKRATSGGEWPQEPSSQEFQCSPSSSDTQTSWIL\*Stop*
