# Supplementary material
Source: PubMed Central journal article supplement (PMC2224237)

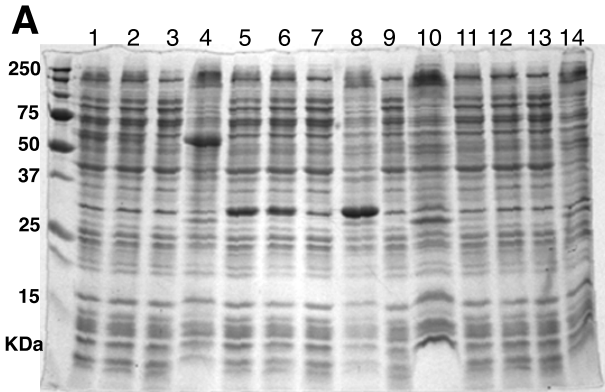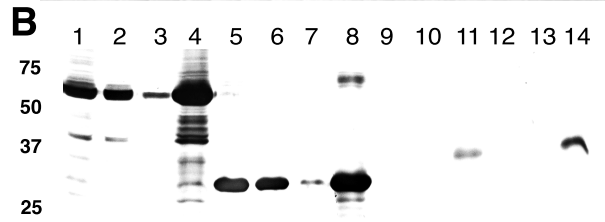

Supplement: pnas_0709737104_2.pdf [file pnas_0709737104_2.pdf]
